# Supplementary material for: Novel Associations of Nonstructural Loci with Paraoxonase Activity
Source: Hindawi journal article supplement (doi:10.1155/2012/189681), 2012-01-01

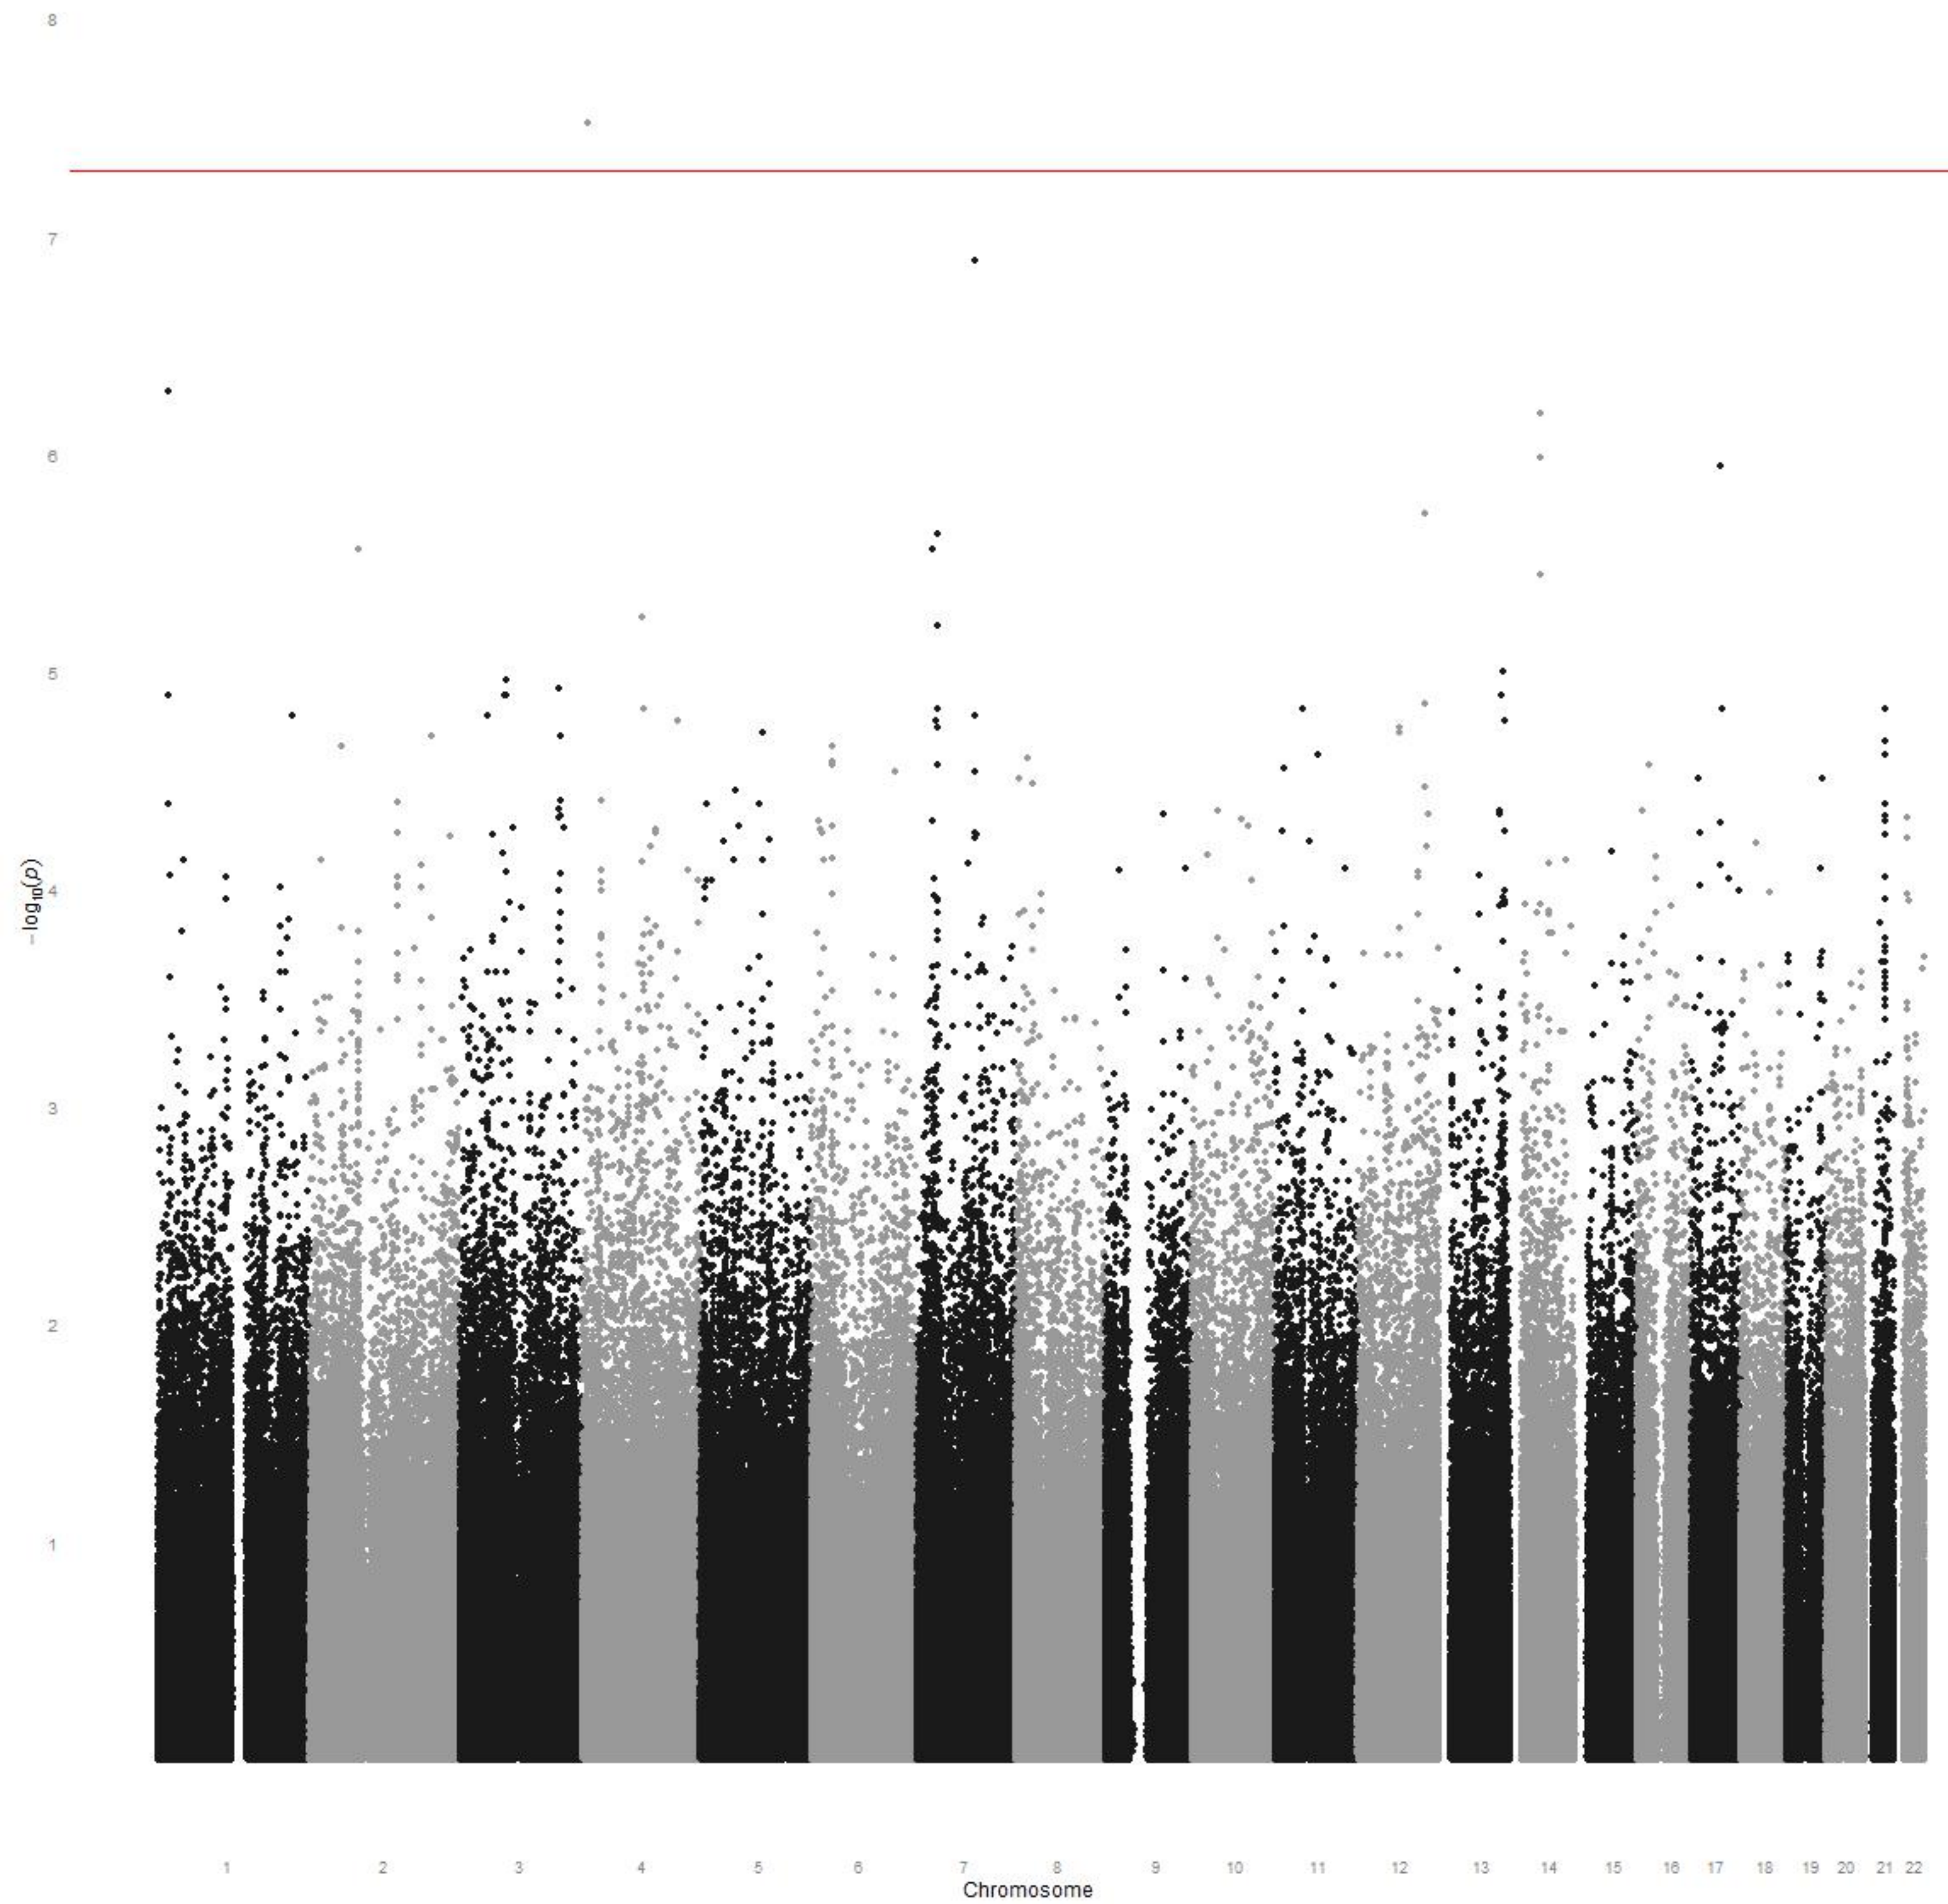

▪ paxm\_out  
| Lambda = 1.0190 | Data points above lift off line: 235

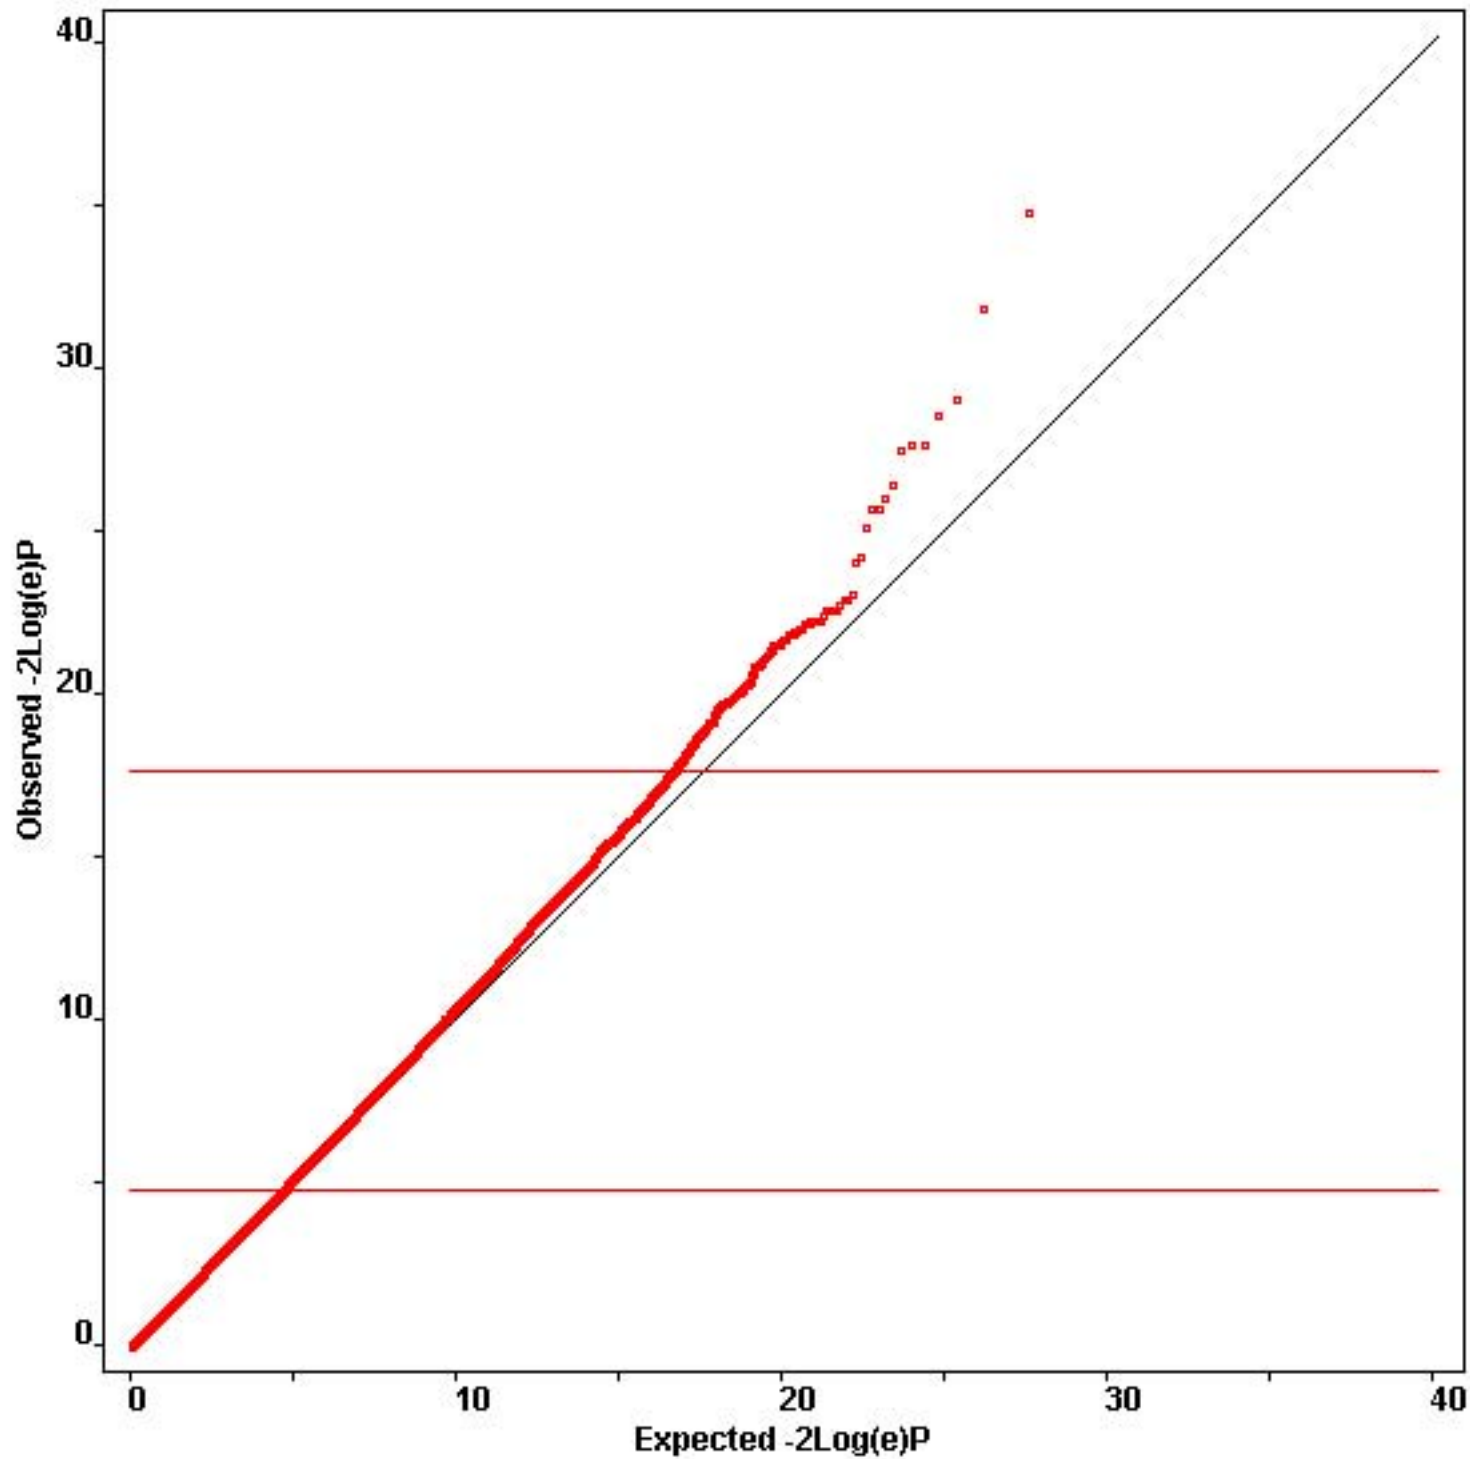



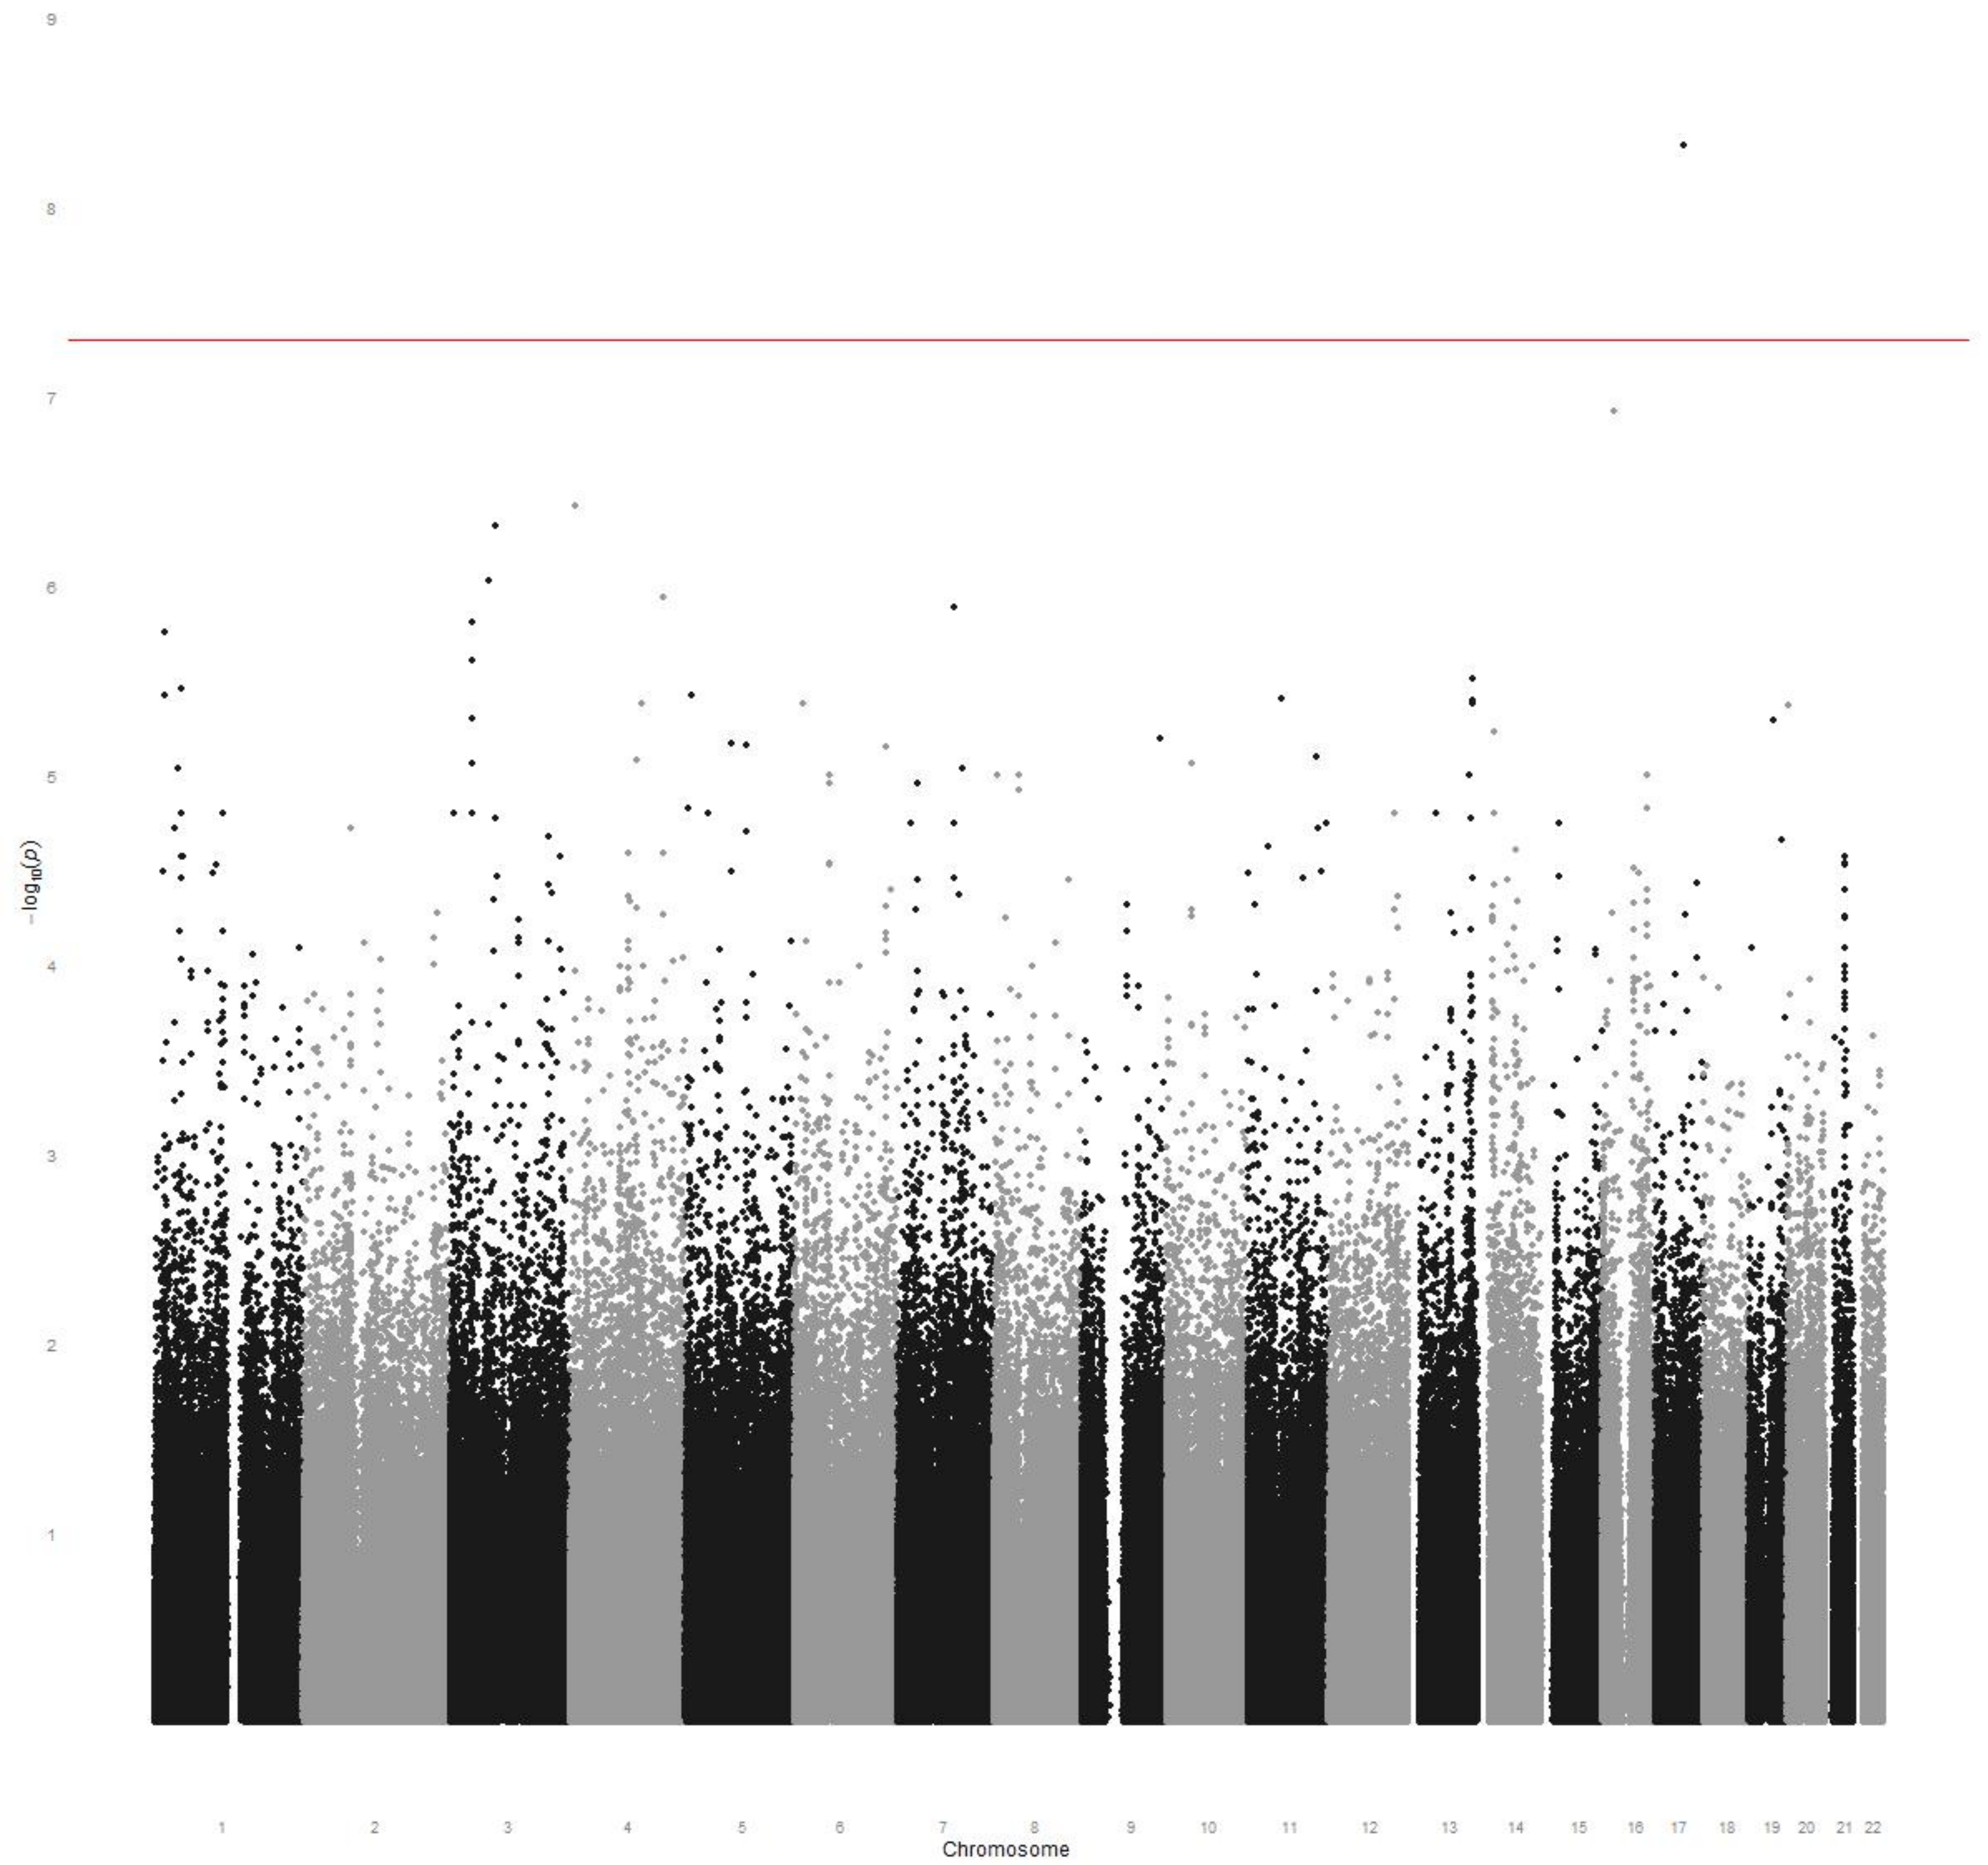

▪ pcom\_out  
| Lambda = 1.0155 | Data points above lift off line: 976

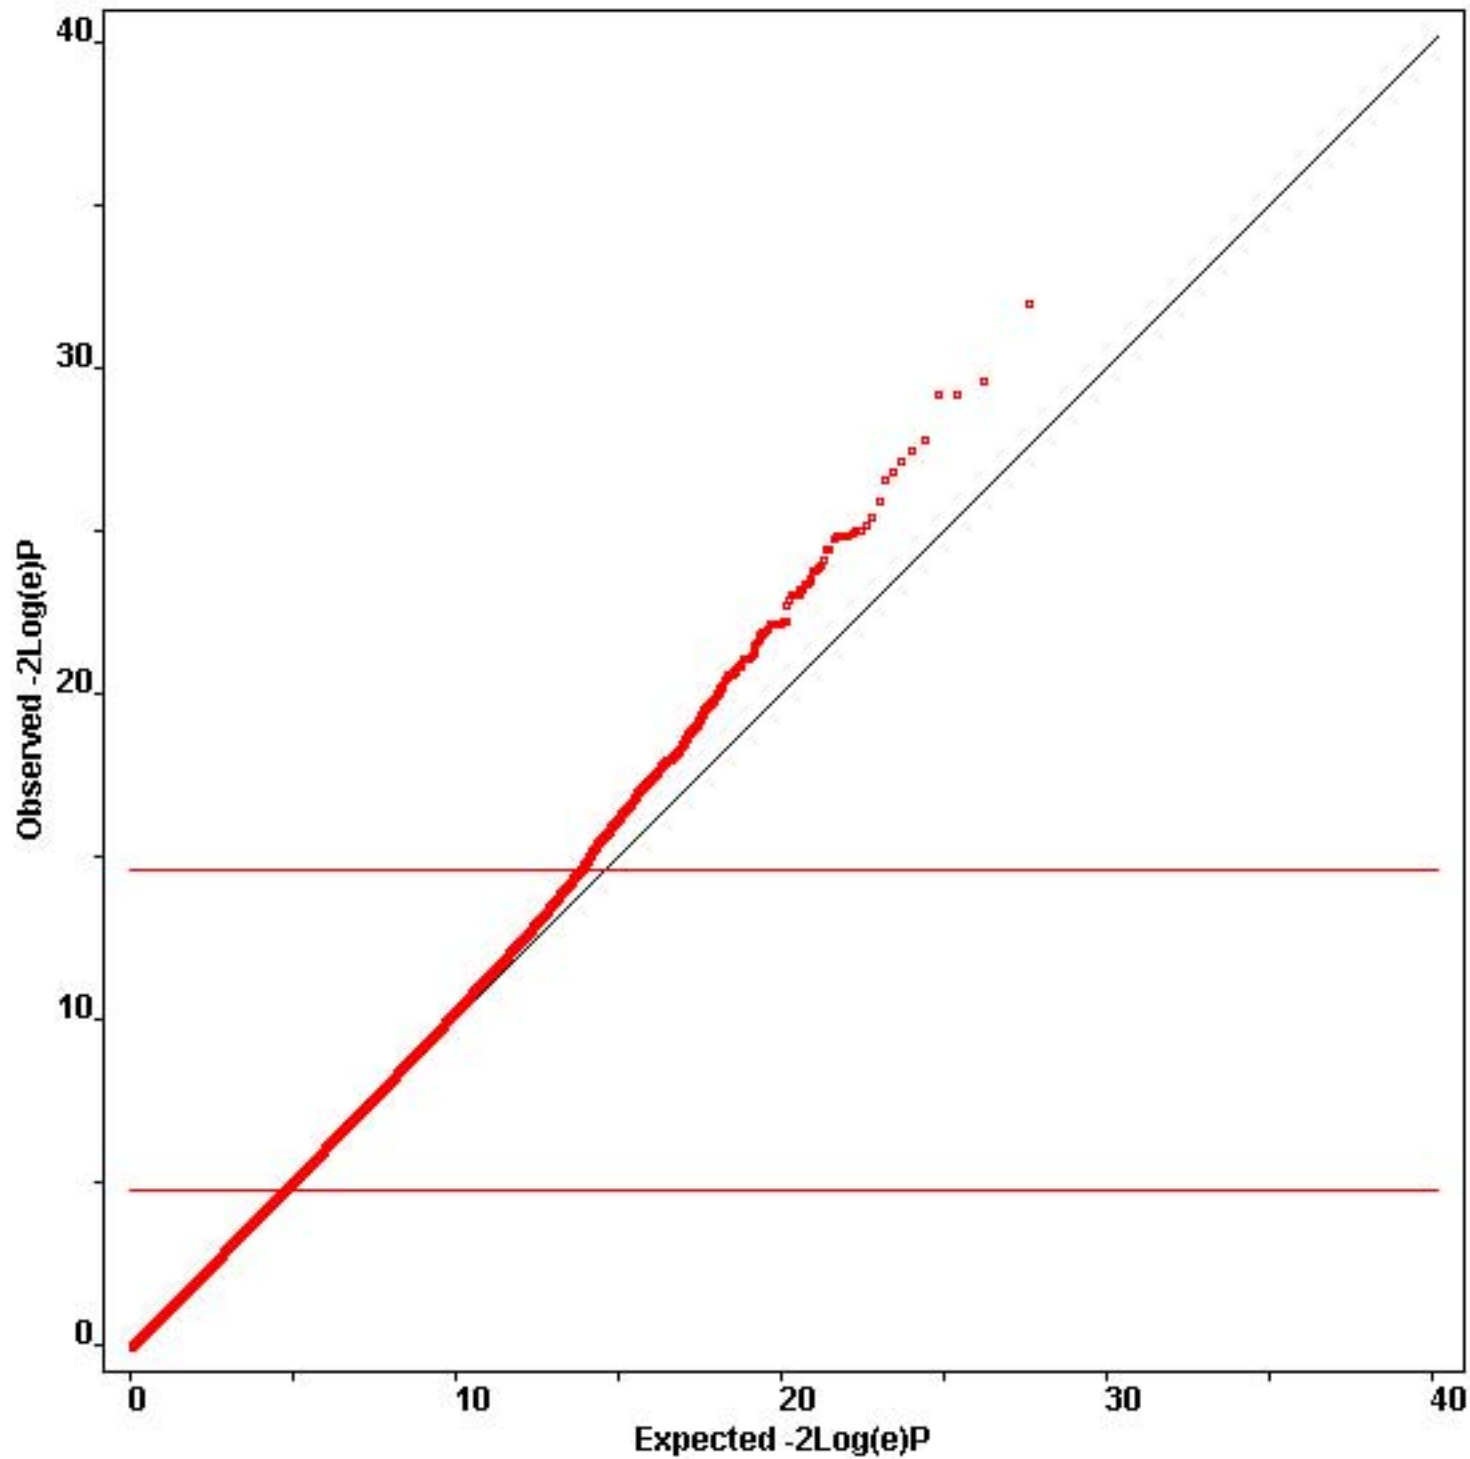



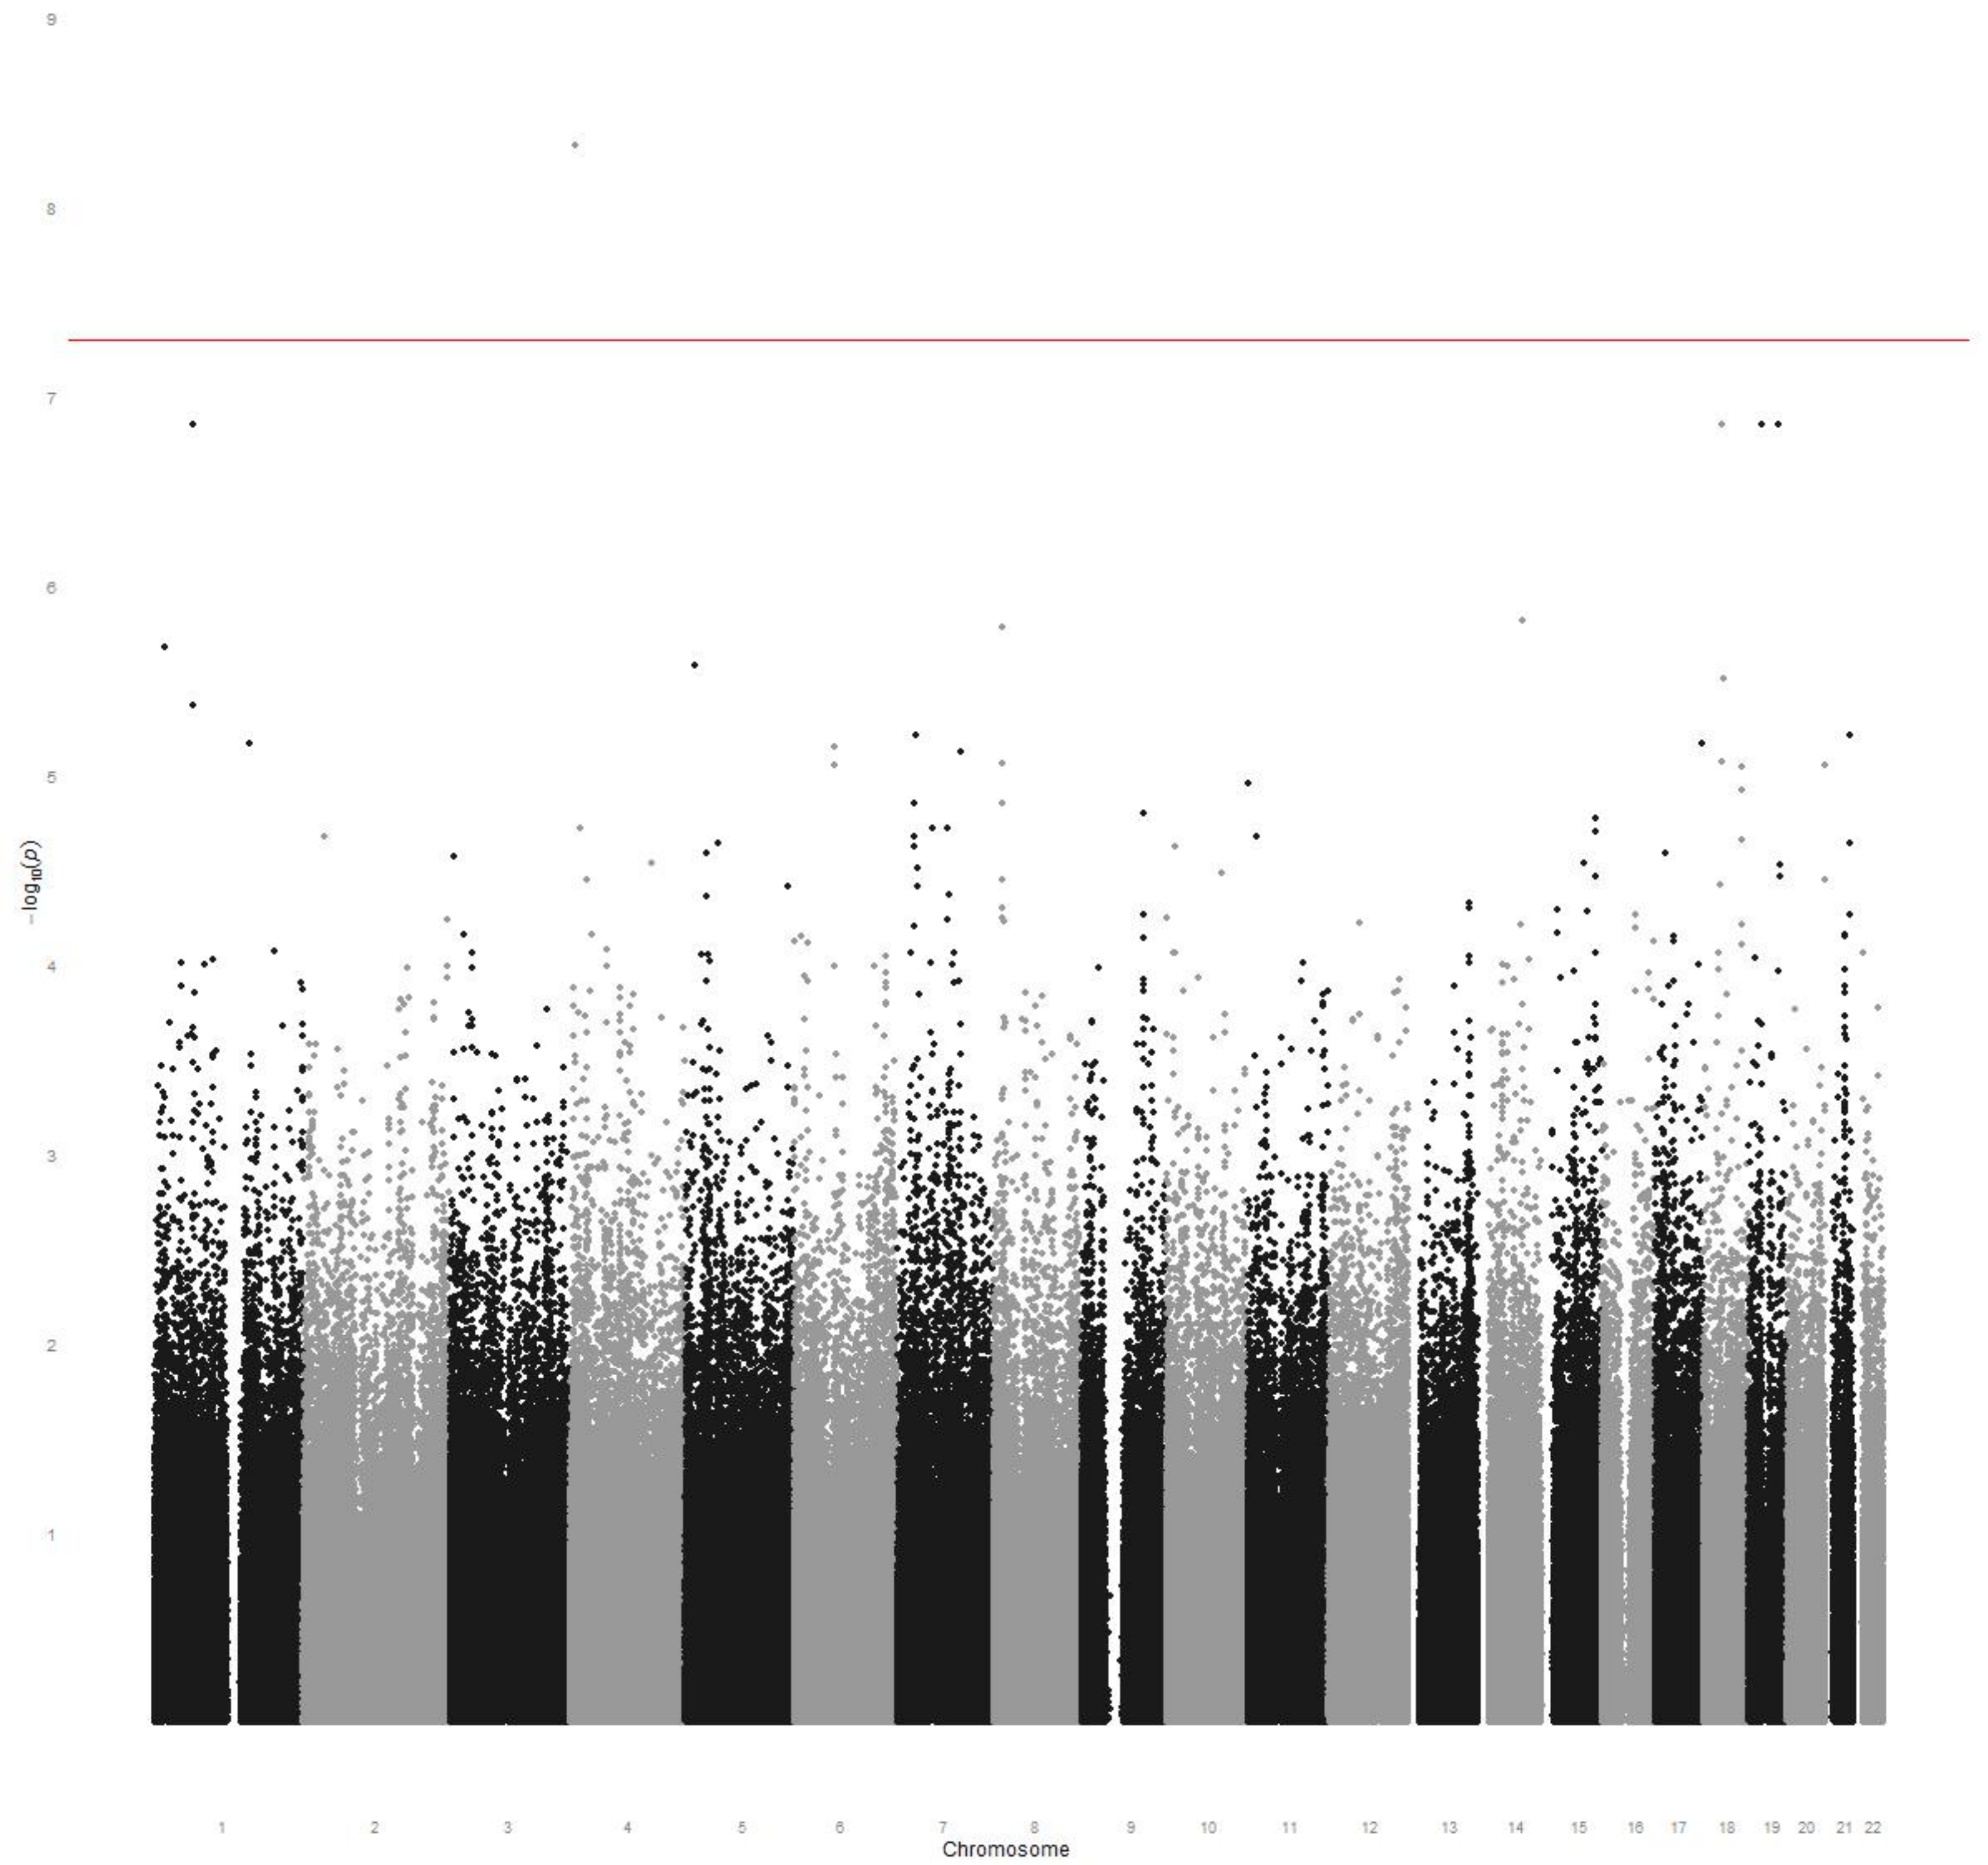

▪ poxm\_out  
| Lambda = 1.0130 | Data points above lift off line: 74

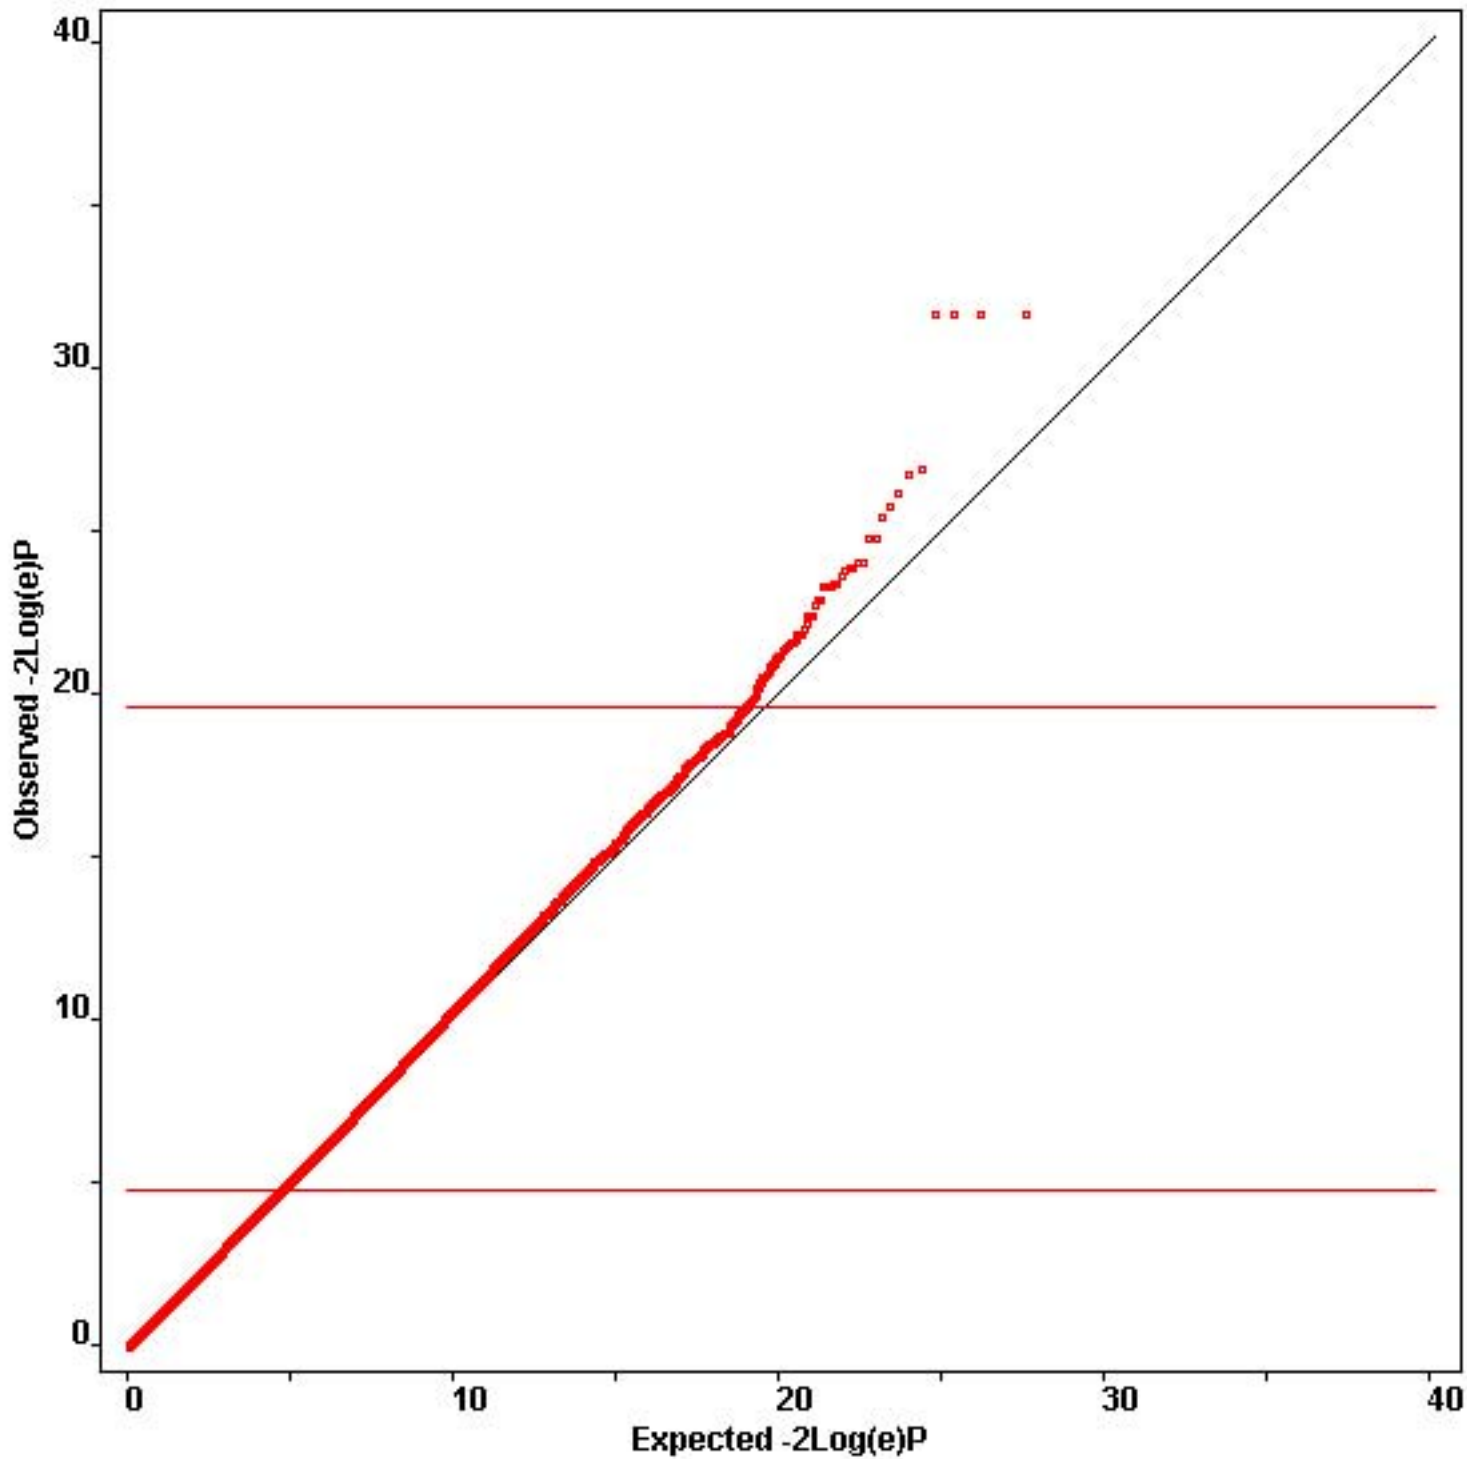

Supplement: f1 [file 189681.f1.pdf]
